# Supplementary material
Source: PubMed Central journal article supplement (PMC1413792)

(4-3,4-3,5) 4G2CH<sub>2</sub>OH  
25°C (as prepared, 1<sup>st</sup> heating)

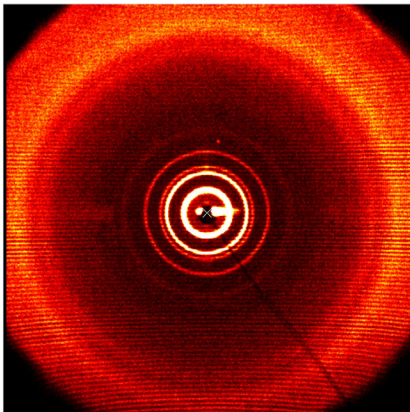

(4-3,4-3,5) 4G2CH<sub>2</sub>OH  
90°C (as prepared, 1<sup>st</sup> heating)

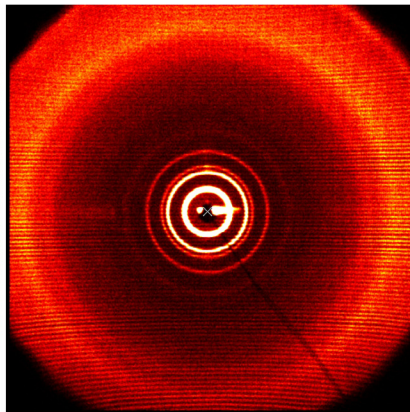

(4-3,4-3,5) 4G2CH<sub>2</sub>OH  
85°C (1<sup>st</sup> cooling)

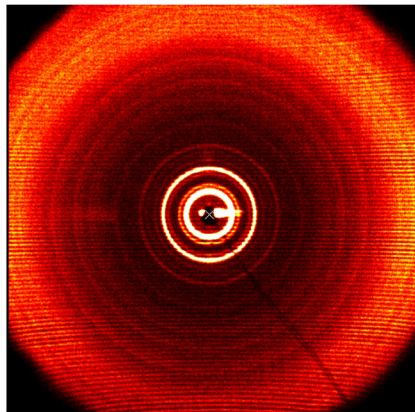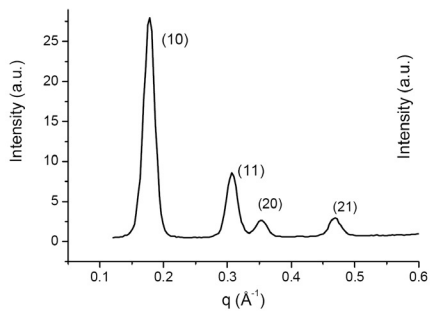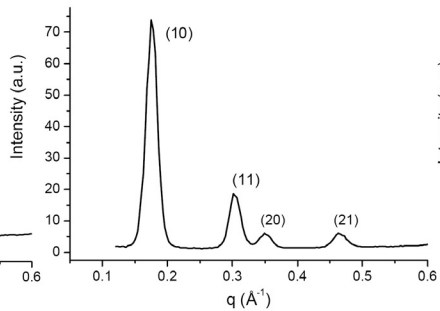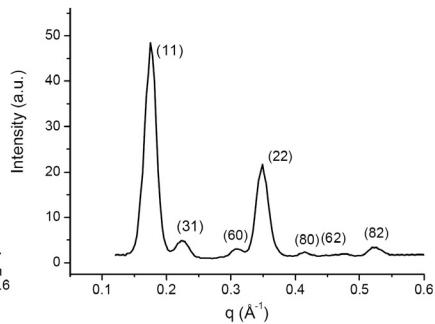

Supplement: pnas_0509676103_7.pdf [file pnas_0509676103_7.pdf]
