# Supplementary material
Source: PubMed Central journal article supplement (PMC1413792)
Supplement: pnas_0509676103_8.pdf [file pnas_0509676103_8.pdf]

**Table 2.** Thermal transitions of (4-3,4-3,5)nG2-CH<sub>2</sub>-X with X = Boc-L-Tyr-L-Ala-OMe and X=OH, n = 1-16

| Thermal transitions (°C) and the corresponding enthalpy changes (kcal/mol) <sup>‡</sup> |                                                                                                                                                                                           |                                                                            |
|-----------------------------------------------------------------------------------------|-------------------------------------------------------------------------------------------------------------------------------------------------------------------------------------------|----------------------------------------------------------------------------|
| n                                                                                       | Heating                                                                                                                                                                                   | Cooling                                                                    |
| 1*                                                                                      | Φ <sub>h</sub> <sup>io</sup> 22 (2.0) Φ <sub>h</sub> 61 (0.03) i<br>Φ <sub>h</sub> <sup>io</sup> 22 (1.7) Φ <sub>h</sub> 61 (0.03) i                                                      | i 56 (0.03) Φ <sub>h</sub> 14 (1.8) Φ <sub>h</sub> <sup>io</sup>           |
| 2*                                                                                      | Φ <sub>h</sub> <sup>io</sup> 71 (7.4) <sup>§</sup> Φ <sub>r-s</sub> 79 i<br>Φ <sub>h</sub> <sup>io</sup> 56 (2.4) Φ <sub>r-s</sub> 80 (3.0) i                                             | i 69 (0.9) Φ <sub>r-s</sub> 52 (2.2) Φ <sub>h</sub> <sup>io</sup>          |
| 4*                                                                                      | Φ <sub>h</sub> <sup>io</sup> 101 (8.8) <sup>§</sup> Φ <sub>r-s</sub> 105 i<br>Φ <sub>r-s</sub> <sup>io</sup> 99 (2.8) Φ <sub>r-s</sub> 106 (4.6) i                                        | i 99 Φ <sub>r-s</sub> 95 (6.8) <sup>§</sup> Φ <sub>r-s</sub> <sup>io</sup> |
| 6*                                                                                      | Φ <sub>h</sub> <sup>io</sup> 103 (3.0) Φ <sub>r-c</sub> 116 (5.8) i<br>Φ <sub>r-c</sub> <sup>io</sup> 103 (3.0) Φ <sub>r-c</sub> 116 (5.7) i                                              | i 112 (6.1) Φ <sub>r-c</sub> 76 (2.7) Φ <sub>r-c</sub> <sup>io</sup>       |
| 8*                                                                                      | Φ <sub>h</sub> <sup>io</sup> 101 (3.8) Φ <sub>r-c</sub> 126 (5.9) i<br>Φ <sub>r-c</sub> <sup>io</sup> 102 (3.8) Φ <sub>r-c</sub> 126 (5.9) i                                              | i 122 (6.2) Φ <sub>r-c</sub> 70 (2.4) Φ <sub>r-c</sub> <sup>io</sup>       |
| 10*                                                                                     | Φ <sub>h</sub> <sup>io</sup> 89 (1.1) Φ <sub>h</sub> 129 (5.1) i<br>Φ <sub>h</sub> 71 (-2.5) Φ <sub>h</sub> <sup>io</sup> 95 (1.7) Φ <sub>h</sub> 129 (5.2) i                             | i 126 (5.0) Φ <sub>h</sub>                                                 |
| 12*                                                                                     | Φ <sub>h,k</sub> 39 (4.9) Φ <sub>h</sub> <sup>io</sup> 85 (2.6) Φ <sub>h</sub> 133 (5.3) i<br>Φ <sub>h,k</sub> 76 (-1.2) Φ <sub>h</sub> <sup>io</sup> 90 (1.2) Φ <sub>h</sub> 132 (5.5) i | i 129 (5.8) Φ <sub>h</sub>                                                 |
| 14*                                                                                     | Φ <sub>h,k</sub> 47 (13.8) Φ <sub>h</sub> <sup>io</sup> Φ <sub>h</sub> 133 (4.0) i<br>Φ <sub>h,k</sub> 21 (5.4) Φ <sub>h</sub> <sup>io</sup> Φ <sub>h</sub> 133 (3.9) i                   | i 130 (5.0) Φ <sub>h</sub> 12 (5.7) Φ <sub>h,k</sub>                       |
| 16*                                                                                     | Φ <sub>h,k</sub> 49 (21.5) Φ <sub>h</sub> <sup>io</sup> Φ <sub>h</sub> 128 (1.3) i<br>Φ <sub>h,k</sub> 45 (13.3) Φ <sub>h</sub> <sup>io</sup> Φ <sub>h</sub> 126 (4.0) i                  | i 125 (4.8) Φ <sub>h</sub> 36 (14.0) Φ <sub>h,k</sub>                      |
| 1 <sup>†</sup>                                                                          | Φ <sub>r</sub> <sup>io</sup> 72 (9.5) i<br>g 42 i                                                                                                                                         | i 36 g                                                                     |
| 2 <sup>†</sup>                                                                          | Φ <sub>r</sub> <sup>io</sup> 83 (11.2) i<br>g 38 i                                                                                                                                        | i 33 g                                                                     |
| 4 <sup>†</sup>                                                                          | Φ <sub>r,k</sub> 87 (5.5) Φ <sub>r</sub> <sup>io</sup> 103 (6.3) i<br>g 42 g                                                                                                              | i 29 g                                                                     |
| 6 <sup>†</sup>                                                                          | Φ <sub>h,k</sub> 95 (8.9) Φ <sub>h</sub> <sup>io</sup> 108 (1.2) i<br>Φ <sub>h</sub> <sup>io</sup> 64 (4.3) i                                                                             | i 63 (3.6) Φ <sub>h</sub> <sup>io</sup>                                    |
| 8 <sup>†</sup>                                                                          | Φ <sub>h,k</sub> 80 (5.1) Φ <sub>h</sub> <sup>io</sup> 93 (5.0) i<br>Φ <sub>h,g</sub> <sup>io</sup> 56 Φ <sub>h</sub> <sup>io</sup> 80 (7.3) i                                            | i 76 (7.3) Φ <sub>h</sub> <sup>io</sup>                                    |
| 10 <sup>†</sup>                                                                         | Φ <sub>h,g</sub> <sup>io</sup> 57 Φ <sub>h</sub> <sup>io</sup> 89 (4.5) i<br>Φ <sub>h,g</sub> <sup>io</sup> 56 Φ <sub>h</sub> 89 (4.8) i                                                  | i 86 (5.3) Φ <sub>h</sub> 55 Φ <sub>h,g</sub>                              |
| 12 <sup>†</sup>                                                                         | Φ <sub>h,g</sub> 56 Φ <sub>h</sub> 96 (5.1) i<br>Φ <sub>h,g</sub> 55 Φ <sub>h</sub> 96 (5.1) i                                                                                            | i 94 (5.6) Φ <sub>h</sub> 49 Φ <sub>h,g</sub>                              |
| 14 <sup>†</sup>                                                                         | Φ <sub>h,k</sub> 43 (10.9) Φ <sub>h</sub> 100 (5.3) i<br>Φ <sub>h,k</sub> 12 (5.2) Φ <sub>h,g</sub> 59 Φ <sub>h</sub> 100 (5.4) i                                                         | i 98 (5.7) Φ <sub>h</sub> 7 (6.5) Φ <sub>h,k</sub>                         |
| 16 <sup>†</sup>                                                                         | Φ <sub>h,k</sub> 55 (16.1) Φ <sub>h</sub> 103 (5.5) i<br>Φ <sub>h,k</sub> 35 (10.1) Φ <sub>h,g</sub> 61 Φ <sub>h</sub> 102 (5.5) i                                                        | i 100 (5.7) Φ <sub>h</sub> 28 (10.9) Φ <sub>h,k</sub>                      |

i, isotropic. g, glass.

\* X = OH.

<sup>†</sup> X = Boc-L-Tyr-L-Ala-OMe.

<sup>‡</sup> Thermal transitions (°C) and enthalpy changes (kcal/mol) were determined by DSC (10 °C/min); data from the first heating and cooling scans are on the first line, and data from the second heating are on the second line.

<sup>§</sup> Sum of enthalpy changes for two overlapped peaks.
