# Supplementary material
Source: PubMed Central journal article supplement (PMC1413792)
Supplement: pnas_0509676103_9.pdf [file pnas_0509676103_9.pdf]

**Table 3.** Structural and retrostructural analysis of the  $\Phi_h$  lattices self-organized from (4-3,4-3,5)nG2-CH<sub>2</sub>-X with X = Boc-L-Tyr-L-Ala-OMe and X = OH,  $n = 1-16$

| $n$             | $T, ^\circ\text{C}$ | $d_{10}, \ddagger \text{ \AA}$<br>[A <sub>10</sub> , § a.u.] | $d_{11}, \ddagger \text{ \AA}$<br>[A <sub>11</sub> , § a.u.] | $d_{20}, \ddagger \text{ \AA}$<br>[A <sub>20</sub> , § a.u.] | $d_{21}, \ddagger \text{ \AA}$<br>[A <sub>21</sub> , § a.u.] | $a = D_{\text{col}}, \text{¶ \AA}$ | $D_{\text{pore}}, \text{ \AA}$ | $\rho_{20}, \text{   g/cm}^3$ | $\mu^{**}$<br>(dendrons/<br>stratum) | $\alpha', \text{††}^\circ$ |
|-----------------|---------------------|--------------------------------------------------------------|--------------------------------------------------------------|--------------------------------------------------------------|--------------------------------------------------------------|------------------------------------|--------------------------------|-------------------------------|--------------------------------------|----------------------------|
| 1*              | 20                  | 31.1<br>[38.8]                                               | 17.9<br>[30.3]                                               | 15.6<br>[24.3]                                               | 11.8<br>[6.8]                                                | 36.0                               | 6.8                            | 1.23                          | 5.7                                  | 63.2                       |
| 2*              | 30                  | 33.2<br>[43.0]                                               | 19.2<br>[26.5]                                               | 16.6<br>[20.4]                                               | 12.6<br>[10.1]                                               | 38.4                               | 6.8                            | 1.12                          | 5.8                                  | 62.1                       |
| 4*              | 90                  | 36.4<br>[43.3]                                               | 21.0<br>[28.1]                                               | 18.3<br>[16.7]                                               | 13.7<br>[10.6]                                               | 42.1                               | 6.7                            | 1.12                          | 5.8                                  | 62.1                       |
| 6*              | 90                  | 38.5<br>[50.2]                                               | 22.1<br>[23.6]                                               | 19.2<br>[16.5]                                               | 14.5<br>[9.7]                                                | 44.4                               | 6.6                            | 1.12                          | 5.9                                  | 61.0                       |
| 8*              | 60                  | 40.7<br>[57.0]                                               | 23.2<br>[20.9]                                               | 19.9<br>[17.2]                                               | 15.3<br>[4.9]                                                | 46.5                               | 5.1                            | 1.1                           | 6.0                                  | 60.0                       |
| 10*             | 26                  | 43.4<br>[60.9]                                               | 24.9<br>[20.5]                                               | 21.6<br>[18.6]                                               |                                                              | 49.9                               | < 3 <sup>¶¶</sup>              | 1.05                          | 5.9                                  | 61.0                       |
| 12*             | 26                  | 45.6<br>[64.1]                                               | 26.2<br>[18.5]                                               | 22.8<br>[17.3]                                               |                                                              | 52.6                               | < 3 <sup>¶¶</sup>              | 1.03                          | 6.0                                  | 60.0                       |
| 14*             | 50                  | 49.2<br>[76.8]                                               | 28.3<br>[10.1]                                               | 24.6<br>[13.1]                                               |                                                              | 56.7                               | < 3 <sup>¶¶</sup>              | 1.03                          | 5.9                                  | 61.0                       |
| 16*             | 65                  | 52.1<br>[70.8]                                               | 30.2<br>[10.2]                                               | 26.1<br>[14.4]                                               | 19.7<br>[4.6]                                                | 60.3                               | < 3 <sup>¶¶</sup>              | 1.06                          | 6.5                                  | 55.4                       |
| 6 <sup>†</sup>  | 30                  | 58.4<br>[33.2]                                               | 33.3<br>[26.6]                                               | 29.0<br>[27.3]                                               | 22.4<br>[12.8]                                               | 67.1                               | 15.8                           | 1.12                          | 10.0                                 | 36.0                       |
| 8 <sup>†</sup>  | 30                  | 62.1<br>[38.6]                                               | 35.4<br>[28.3]                                               | 30.7<br>[25.9]                                               | 23.9<br>[7.3]                                                | 71.1                               | 15.3                           | 1.10                          | 10.3                                 | 35.0                       |
| 10 <sup>†</sup> | 30                  | 65.3<br>[41.9]                                               | 37.4<br>[26.3]                                               | 32.5<br>[25.6]                                               | 24.7<br>[6.2]                                                | 75.1                               | 14.7                           | 1.07                          | 11.2                                 | 32.1                       |
| 12 <sup>†</sup> | 25                  | 67.0<br>[43.7]                                               | 38.4<br>[26.6]                                               | 33.5<br>[24.3]                                               | 25.5<br>[5.4]                                                | 77.1                               | 13.3                           | 1.02                          | 11.6                                 | 31.0                       |
| 14 <sup>†</sup> | 30                  | 70.5<br>[50.5]                                               | 40.5<br>[25.4]                                               | 35.0<br>[23.7]                                               |                                                              | 81.0                               | 12.7                           | 1.07                          | 11.9                                 | 30.3                       |
| 16 <sup>†</sup> | 30                  | 74.3<br>[53.1]                                               | 42.2<br>[31.8]                                               | 35.9<br>[15.0]                                               |                                                              | 84.4                               | 11.7                           | 1.07                          | 12.8                                 | 28.1                       |

a.u., arbitrary units.

\* X = OH.

† X = Boc-L-Tyr-L-Ala-OMe.

‡  $d$ -spacings of  $p6mm$  hexagonal columnar lattice ( $\Phi_h$ ).

§ Peak amplitude scaled to the sum of the observed diffraction peaks.

¶ Lattice parameter of  $\Phi_h$   $a = 2\langle d_{100} \rangle / \sqrt{3}$ ,  $\langle d_{100} \rangle = (d_{100} + \sqrt{3}d_{110} + \sqrt{4}d_{200} + \sqrt{7}d_{210})/4$ .

||  $\rho_{20}$  = experimental density at 20 °C.

\*\* Number of monodendrons per  $p6mm$  hexagonal column stratum  $\mu = (\sqrt{3}N_A D^2 t \rho) / 2M$ . Avogadro's number  $N_A = 6.0220455 \times 10^{23} \text{ mol}^{-1}$ , the average height of the column stratum  $t = 4.7 \text{ \AA}$ ,  $M$  = molecular weight of monodendron.

†† Projection of the solid angle for tapered monodendron  $\alpha' = 360 / \mu$  (deg).

‡‡ Too small to determine with reasonable error.
