# Supplementary material
Source: PubMed Central journal article supplement (PMC1413792)
Supplement: pnas_0509676103_10.pdf [file pnas_0509676103_10.pdf]

**Table 4.** Structural and retrostructural analysis of the  $\Phi_{r-s}$  and  $\Phi_{r-c}$  lattices self-organized from (4-3,4-3,5)nG2-CH<sub>2</sub>OH,  $n = 2-8$

| $n$ | $T, ^\circ\text{C}$ | $d_{11}, \text{\AA}$ | $d_{20}, \text{\AA}$ | $d_{31}, \text{\AA}$ | $d_{22}, \text{\AA}$ | $a, \text{\AA}$    | $b, \text{\AA}$   | $D_a, \text{\AA}$  | $D_b, \text{\AA}$  | $\rho_{20},^{**}$<br>g/cm <sup>3</sup> | $\mu$<br>(dendrons/<br>stratum) | $\alpha',^{§§}$ ° |
|-----|---------------------|----------------------|----------------------|----------------------|----------------------|--------------------|-------------------|--------------------|--------------------|----------------------------------------|---------------------------------|-------------------|
| 2   | 65                  | 32.8*                | 29.5*                | 17.3*                | 16.3*                | 58.9 <sup>‡</sup>  | 39.1 <sup>‡</sup> | 58.9 <sup>¶</sup>  | 39.1 <sup>¶</sup>  | 1.12                                   | 7.9 <sup>††</sup>               | 45.4              |
| 4   | 85                  | 36.3 <sup>†</sup>    |                      | 27.7 <sup>†</sup>    | 20.2 <sup>†</sup>    | 122.0 <sup>§</sup> | 38.1 <sup>§</sup> | 70.4 <sup>  </sup> | 93.5 <sup>  </sup> | 1.12                                   | 7.3 <sup>‡‡</sup>               | 50.5              |
| 6   | 90                  |                      | 38.3 <sup>†</sup>    | 21.9 <sup>†</sup>    | 18.9 <sup>†</sup>    | 79.0 <sup>§</sup>  | 43.8 <sup>§</sup> | 45.6 <sup>  </sup> | 43.8 <sup>  </sup> | 1.12                                   | 4.8 <sup>‡‡</sup>               | 75.2              |
| 8   | 110                 |                      | 42.6 <sup>†</sup>    | 24.1 <sup>†</sup>    | 20.8 <sup>†</sup>    | 79.3 <sup>§</sup>  | 47.1 <sup>§</sup> | 45.8 <sup>  </sup> | 47.1 <sup>  </sup> | 1.1                                    | 4.6 <sup>‡‡</sup>               | 77.9              |

\*  $d$ -spacings of  $p2mm$  rectangular simple columnar lattice ( $\Phi_{r-s}$ ).

<sup>†</sup>  $d$ -spacings of  $c2mm$  rectangular centered columnar lattice ( $\Phi_{r-c}$ ).

<sup>‡</sup>  $p2mm$  rectangular simple columnar lattice parameters  $a$  and  $b$ ,  $a = hd$ ,  $b = kd$ , ( $h0$ ) and ( $k0$ ) from diffractions.

<sup>§</sup>  $c2mm$  rectangular centered columnar lattice parameters  $a$  and  $b$ ,  $a = hd$ ,  $b = kd$ , ( $h0$ ) and ( $k0$ ) from diffractions.

<sup>¶</sup> Experimental elliptical column diameters of  $p2mm$  simple rectangular columnar lattice  $D_a = a$  and  $D_b = b$ .

<sup>||</sup> Experimental elliptical column diameters of  $c2mm$  centered rectangular columnar lattice  $D_a = a/\sqrt{3}$  and  $D_b = b$ .

\*\*  $\rho_{20}$  = experimental density at 20 °C.

<sup>††</sup> Number of monodendrons per elliptical  $p2mm$  simple rectangular column stratum  $\mu = (N_Aabt\rho)/M$ .

<sup>‡‡</sup> Number of monodendrons per elliptical  $c2mm$  centered rectangular column stratum  $\mu = (N_Aabt\rho)/2M$ . Avogadro's number

$N_A = 6.0220455 \times 10^{23} \text{ mol}^{-1}$ . The average height of the column stratum  $t = 4.7 \text{ \AA}$ ,  $M$  = molecular weight of monodendron.

<sup>§§</sup> Projection of the solid angle for tapered monodendron  $\alpha' = 360/\mu$  (deg).
