# Supplementary material
Source: PubMed Central journal article supplement (PMC1413792)

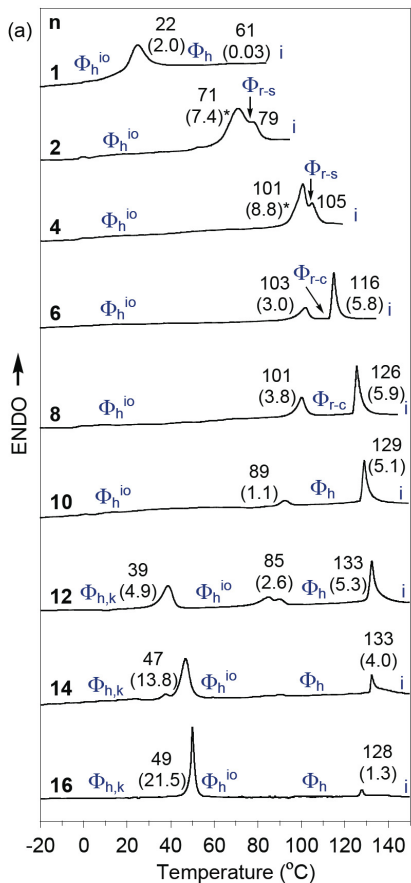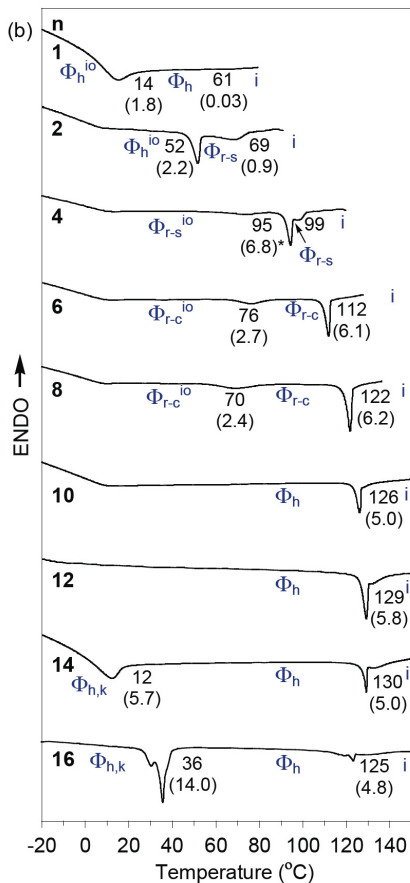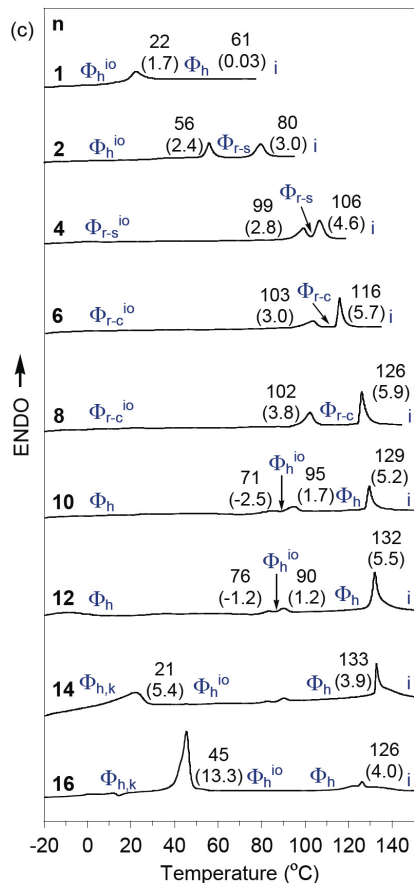

Supplement: pnas_0509676103_1.pdf [file pnas_0509676103_1.pdf]

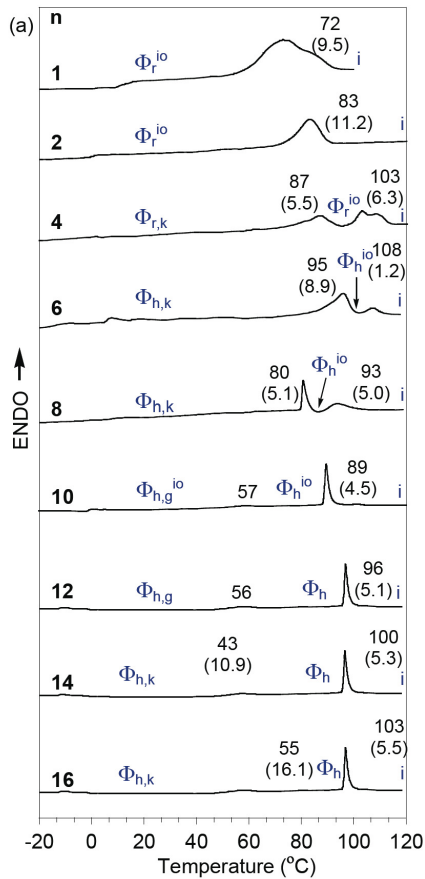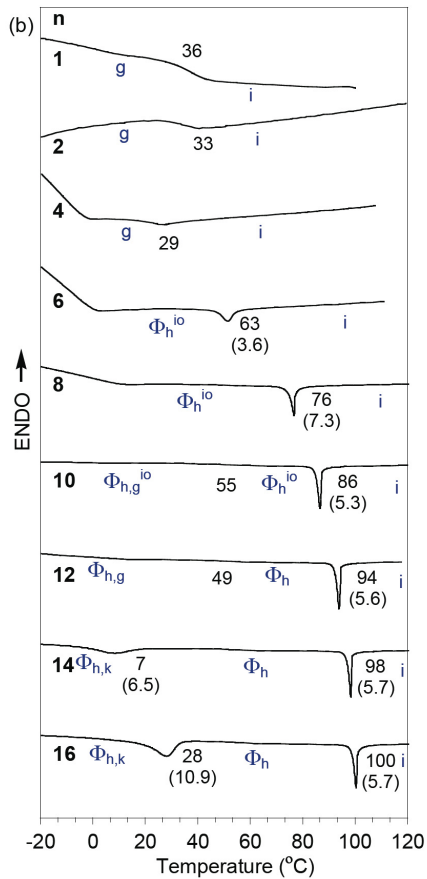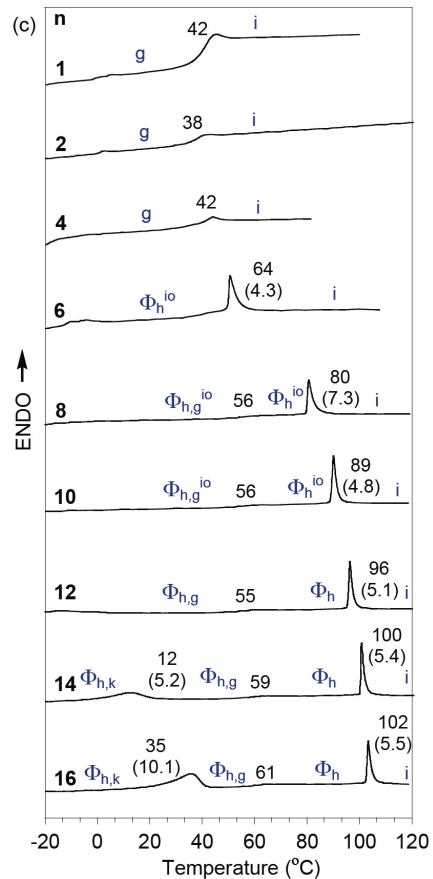

Supplement: pnas_0509676103_2.pdf [file pnas_0509676103_2.pdf]

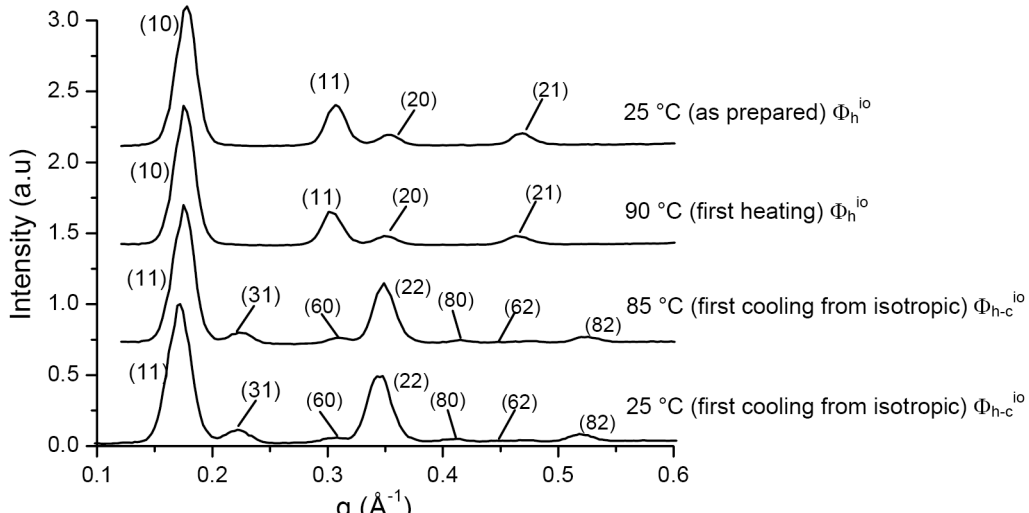

Supplement: pnas_0509676103_3.pdf [file pnas_0509676103_3.pdf]

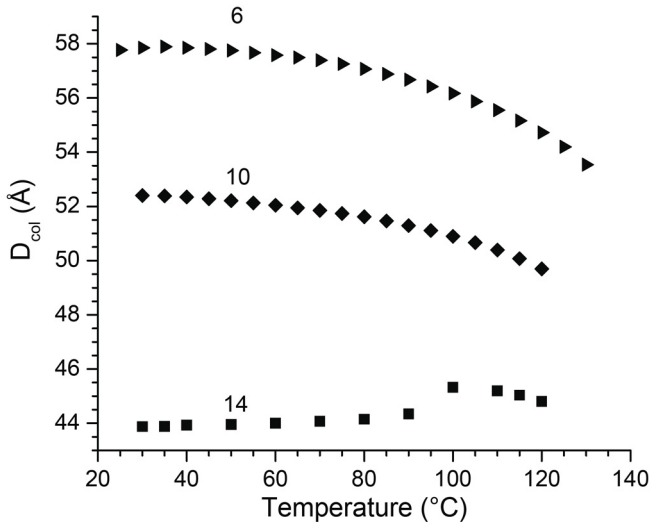

Supplement: pnas_0509676103_4.pdf [file pnas_0509676103_4.pdf]

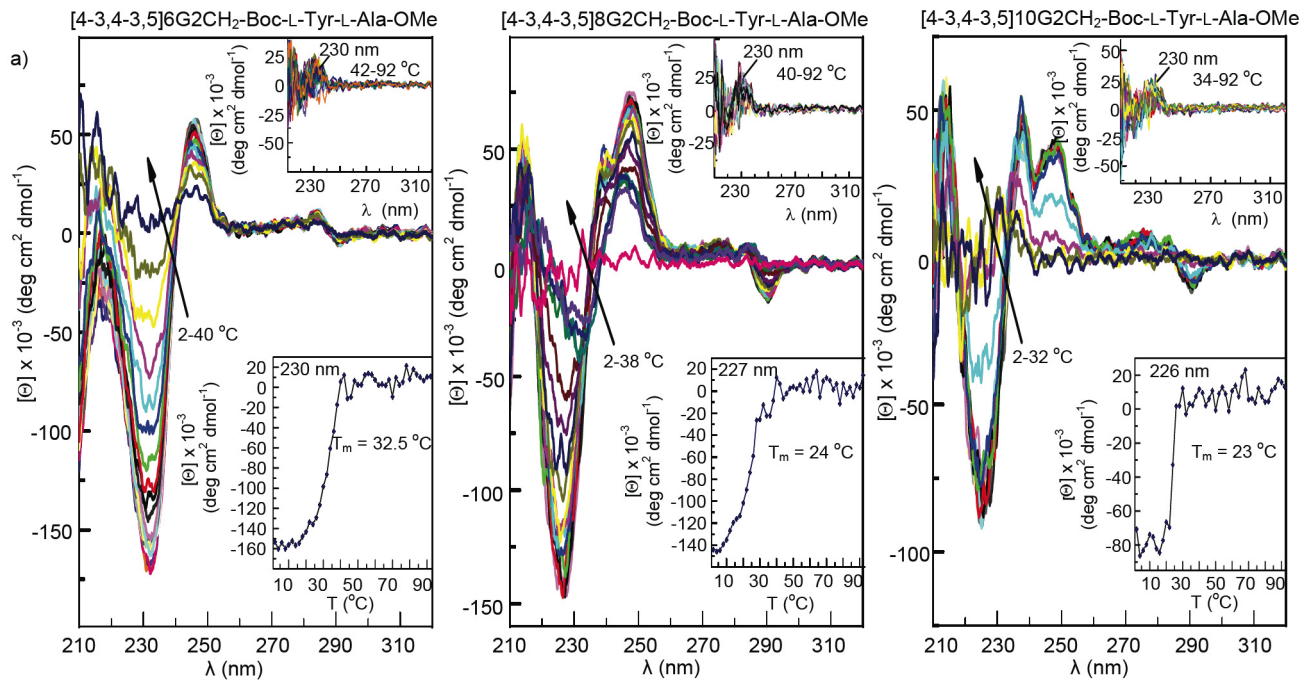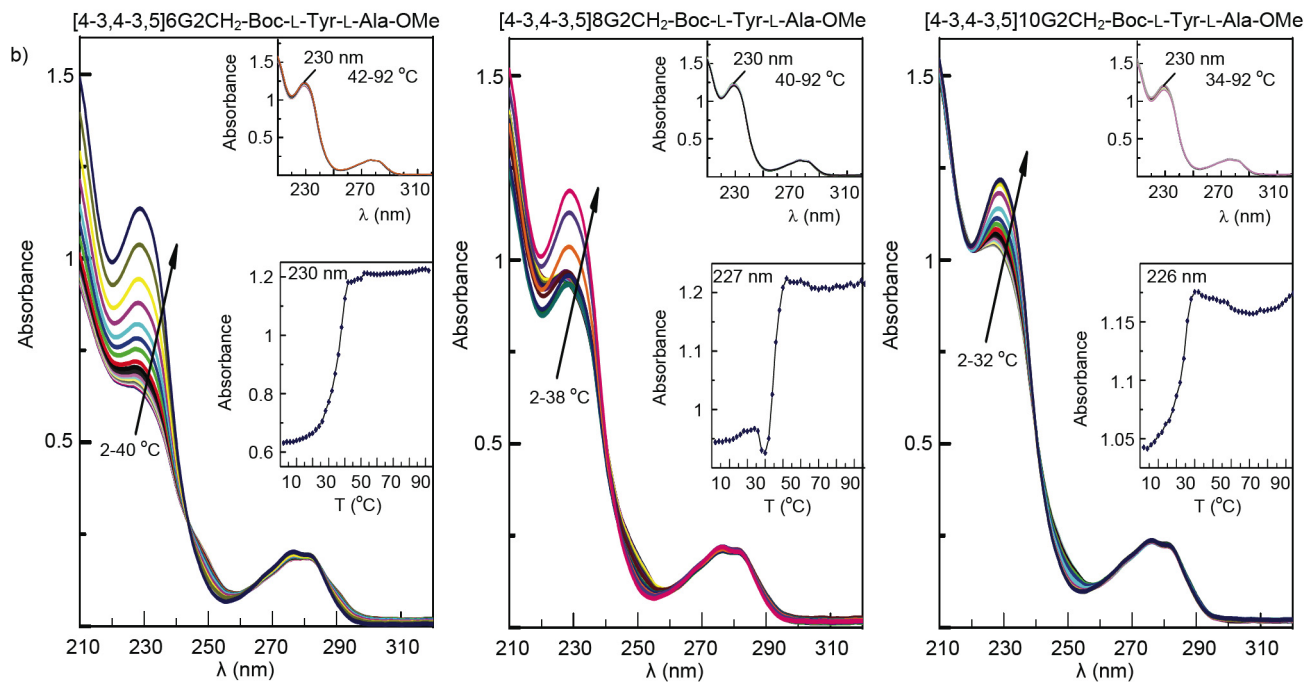

Supplement: pnas_0509676103_5.pdf [file pnas_0509676103_5.pdf]

a)

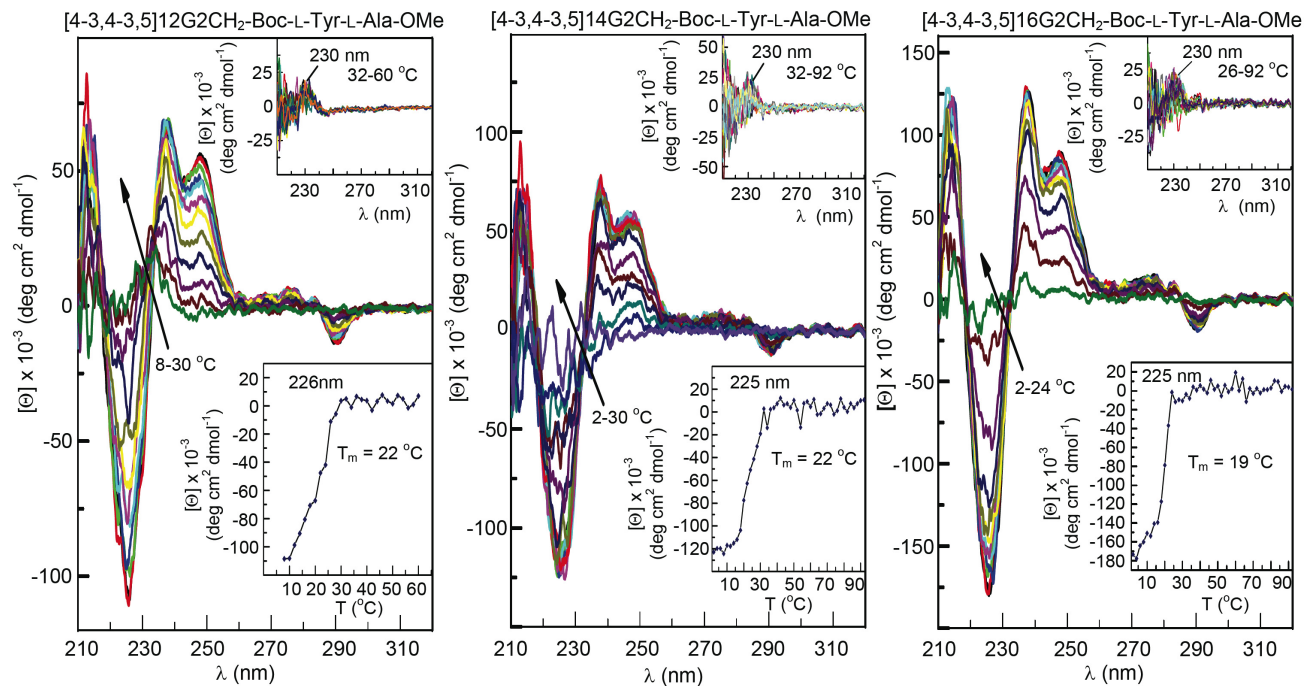

b)

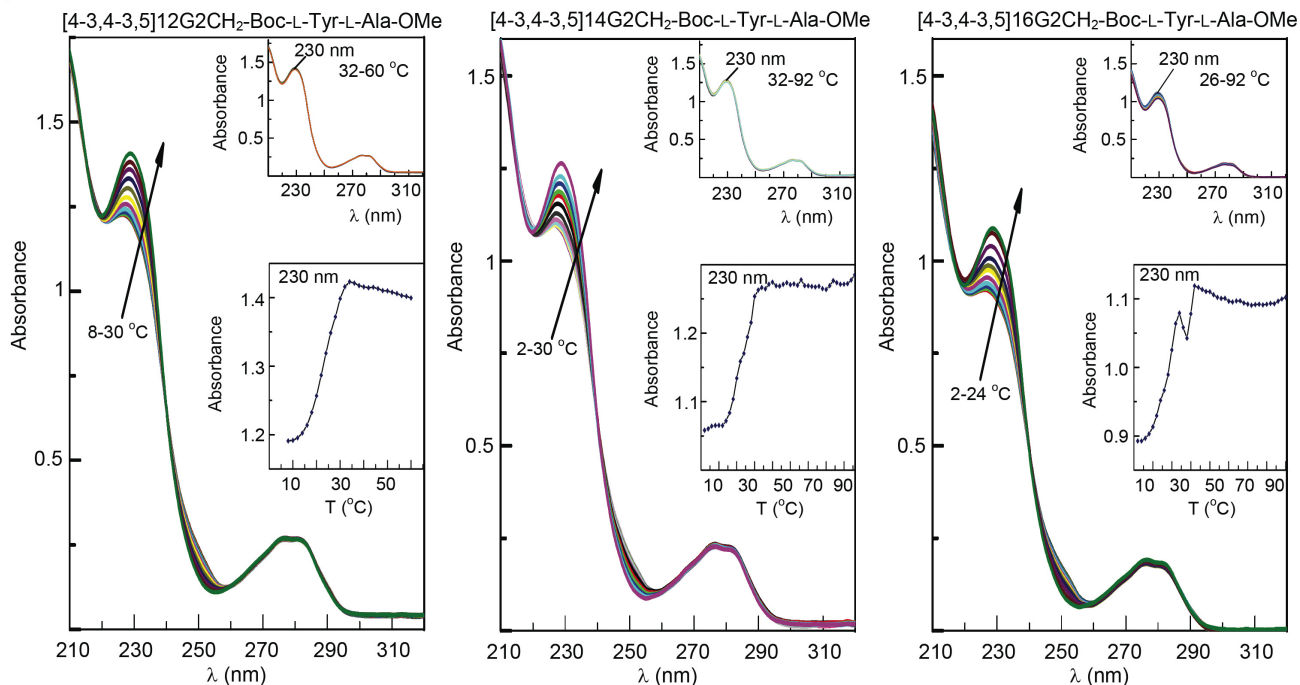

Supplement: pnas_0509676103_6.pdf [file pnas_0509676103_6.pdf]
